# Supplementary material for: T cell receptor alpha variable 12‐2 bias in the immunodominant response to Yellow fever virus
Source: PubMed Central journal article supplement (PMC5887915; doi:10.1002/eji.201747082), 2017-12-11
Supplement: EJI-48-258-s002.pdf [file EJI-48-258-s002.pdf]

# European Journal of Immunology

**Supporting Information**

**for**

**DOI 10.1002/eji.201747082**

Amandine Bovay, Vincent Zoete, Garry Dolton, Anna M. Bulek, David K. Cole,  
Pierre J. Rizkallah, Anna Fuller, Konrad Beck, Olivier Michielin, Daniel E. Speiser,  
Andrew K. Sewell and Silvia A. Fuertes Marraco

**T cell receptor alpha variable 12-2 bias in the immunodominant response to  
Yellow fever virus**

**Supporting Information for:**

**T cell Receptor Alpha Variable 12-2 bias in the  
immunodominant response to Yellow fever Virus**

Amandine Bovay, Vincent Zoete, Garry Dolton, Anna M. Bulek, David K. Cole, Pierre J.  
Rizkallah, Anna Fuller, Konrad Beck, Olivier Michielin, Daniel E. Speiser, Andrew K.  
Sewell, Silvia A. Fuertes Marraco#

# Corresponding author: [silviasuncion.fuertesmarraco@unil.ch](mailto:silviasuncion.fuertesmarraco@unil.ch)

**This PDF file includes:**

Table S1. Analysis of the relative frequencies of T cell clonotypes within A2/LLW-specific CD8 T cells.

Table S2. Molecular interactions between TCR and pMHC in the structural model.

Fig S1. High similarity between the YF5048 and MEL5 TCRs and their cognate pMHC complexes.

Fig S2. Peptide recognition signature of individual TCRs derived from TRAV12-2 positive and negative clones specific for A2/LLW.

Fig S3. Effect of the single substitution Asn4 -> Arg4 on clone YF5048.

**Table S1. Analysis of the relative frequencies of T cell clonotypes within A2/LLW-specific CD8 T cells.<sup>1</sup>**

| TRAV | CDR3             | TRAJ | Frequency | TRBV | CDR3              | TRBJ | Frequency |
|------|------------------|------|-----------|------|-------------------|------|-----------|
| 12-2 | CAVTDDKIIFG      | 30   | 0.11      | 6-8  | CASSYSRTGSYEQYFG  | 2-7  | single    |
| 12-2 | CAVDSGGYQKVTFG   | 13   | single    | 7-2  | CASSQGLAYEQFFG    | 2-1  | single    |
| 12-2 | CAGGDDKIIFG      | 30   | single    | 9    | CASSVEGPGLFFG     | 2-2  | single    |
| 12-2 | CAVKDARLMFG      | 31   | 0.05      | 2    | CASSEATGASYEQYFG  | 2-7  | 0.07      |
| 12-2 | CAVGSDKIIFG      | 30   | 0.07      | 2    | CASSEYVQYYGYTFG   | 1-2  | single    |
| 12-2 | CAVSDARLMFG      | 31   | single    | 6-8  | CASSEAGQAYEQYFG   | 2-7  | single    |
| 12-2 | CAAFDDKIIFG      | 30   | 0.05      | 9    | CASSEGGQAYNEQFFG  | 2-1  | 0.07      |
| 12-2 | CAASASKLIFG      | 4    | single    | 9    | CASSVSGSSYEQYFG   | 2-7  | single    |
| 12-2 | CAVDTNAGKSTFG    | 27   | single    | 9    | CASSVGTSSYEQYFG   | 2-7  | single    |
| 12-2 | CAAVNNDMRFG      | 43   | single    | 9    | CASSVAGGYEQYFG    | 2-7  | single    |
| 12-2 | CAVG DARLMFG     | 43   | single    | 4-3  | CASSPGLAGGYEQFFG  | 2-1  | 0.05      |
| 12-2 | CAANNARLMFG      | 31   | single    | 28   | CASSPPGTGVYGYTFG  | 1-2  | 0.05      |
| 12-2 | CAVNGNKL VFG     | 47   | single    | 6-8  | CASSYSGGAYGYTFG   | 1-2  | single    |
| 12-2 | CAVGDDKIIFG      | 30   | 0.09      | 27   | CASSQDPGSPRTQYFG  | 2-5  | single    |
| 12-2 | CAVNSNTDKLIFG    | 34   | single    | 6-8  | CASSYSGGSYIEFFG   | 2-1  | single    |
| 12-2 | CAVTTSQTYKYIFG   | 40   | single    | 2    | CAVGDRGYEQYFG     | 2-7  | single    |
| 12-2 | CAATDDKIIFG      | 30   | single    | 9    | CASSTGLAYEQFFG    | 2-1  | single    |
| 12-2 | CAVNDKYKLSFG     | 20   | single    | 9    | CASSVGGVVYNEQFFG  | 2-1  | single    |
| 12-2 | CAGSGDKLIFG      | 34   | single    | 2    | CASDSGDHEQYFG     | 2-7  | 0.05      |
| 12-2 | CAEEGRGNDMRFG    | 43   | single    | 19   | CASSIGPLGQPQHF    | 1-5  | single    |
| 12-2 | CAVSKDDKIIFG     | 30   | single    | 27   | CASSLNPSTDTQYFG   | 2-7  | single    |
| 12-2 | CASRDDKIIFG      | 30   | single    | 19   | CASSIWRRLHLRFG    | 1-6  | single    |
| 12-2 | CAVTPDKVIFG      | 50   | single    | 2    | CASSEYVQYYFYTFG   | 1-2  | single    |
| 12-2 | CAVTSDSWGKLQFG   | 24   | 0.04      | 9    | CASSAGTGAYEQYFG   | 2-7  | single    |
| 12-2 | CAVVDDKLIFG      | 4    | single    | 9    | CASSATSGGADTQYFG  | 2-7  | single    |
| 12-2 | CAVRDDKIIFG      | 30   | single    | 18   | CASGPGTVSYEQYFG   | 2-7  | single    |
| 12-2 | CATSNRLAFG       | 7    | single    | 29-1 | CSVPFAGADTQYFG    | 2-7  | single    |
| 12-1 | CVVNADDMRFG      | 43   | single    | 28   | CASSSLGTGGYGYTFG  | 1-2  | single    |
| 12-1 | CGVDDKIIFG       | 30   | single    | 2    | CASNQGGISYGYTFG   | 1-2  | single    |
| 12-1 | CVVTGTYKYIFG     | 40   | 0.05      | 9    | CASSVATEGYGYTFG   | 1-2  | 0.07      |
| 12-1 | CVVGTDKLIFG      | 34   | single    | 6-8  | CASSRVGN IAGELFFG | 2-2  | single    |
| 13-1 | CAASGTGAGSYQLTF  | 28   | single    | 9    | CASSPSGGGYEQYFG   | 2-7  | single    |
| 27   | CAASSLYGQNFVF    | 26   | single    |      |                   |      |           |
| 19   | CALSENNDYKLSF    | 20   | 0.05      |      |                   |      |           |
| 22   | CAVVPNAGGTSYGKLT | 52   | single    |      |                   |      |           |

<sup>1</sup> TRAV, TRAJ, TRBV, TRBJ segment usage and relative frequencies are indicated for all clonotypes. Public sequences are colored in yellow.

**Table S2. Molecular interactions between TCR and pMHC in the structural model.<sup>2</sup>**

| CDR loop      | TCR residue           | Peptide residue             | MHC residue                           | Bond type     |
|---------------|-----------------------|-----------------------------|---------------------------------------|---------------|
| CDR1 $\alpha$ | Arg28, N $\epsilon$   |                             | Glu166, O $\epsilon$ 1/O $\epsilon$ 2 | Electrostatic |
|               | Arg28, NH2            |                             | Glu166, O $\epsilon$ 1/O $\epsilon$ 2 | Electrostatic |
|               | Arg28, O              |                             | Trp167, N $\epsilon$ 1                | Electrostatic |
|               | Gly29, C $\alpha$     |                             | Trp167, CZ2                           | vdW           |
|               | Gly29, C $\alpha$     | Leu1, C $\delta$ 2          |                                       | vdW           |
|               | Gln31, N $\epsilon$ 2 | Leu2, O                     |                                       | Electrostatic |
|               | Gln31, C $\beta$      | Asn4, C $\beta$ /C $\gamma$ |                                       | vdW           |
|               | Gln31, C $\gamma$     | Asn4, C $\gamma$            |                                       | vdW           |
|               | Gln31, O $\epsilon$ 1 | Asn4, N                     |                                       | Electrostatic |
|               | Ser32, O $\gamma$     | Asn4, N $\delta$ 2          |                                       | Electrostatic |
| CDR2 $\alpha$ | Tyr51, OH             |                             | His151, O                             | Electrostatic |
| CDR3 $\alpha$ | Asn92, O $\delta$ 2   | Asn4, N $\delta$ 2          |                                       | Electrostatic |
|               | Asn94, O              |                             | Arg65, NH2                            | Electrostatic |
|               | Ala95, O              |                             | Arg65, N $\epsilon$                   | Electrostatic |
|               | Ala95, C $\beta$      |                             | Gly62, C $\alpha$ /O                  | vdW           |
|               | Ala95, C $\beta$      |                             | Lys66, C $\epsilon$                   | vdW           |
| CDR2 $\beta$  | Asn48, O $\epsilon$ 1 |                             | Arg65, NH1                            | Electrostatic |
|               | Tyr49, C $\epsilon$ 1 |                             | Arg65, C $\delta$                     | vdW           |
|               | Arg55, NH2            |                             | Glu19, O $\epsilon$ 1                 | Electrostatic |
| CDR3 $\beta$  | Gly97, C $\alpha$     |                             | Thr73, C $\gamma$ 2                   | vdW           |
|               | Ser98, N              | Gly5, O                     |                                       | Electrostatic |
|               | Ser98, N              | Pro6, O                     |                                       | Electrostatic |
|               | Ser98, C $\beta$      | Met7, C $\epsilon$          |                                       | vdW           |

---

<sup>2</sup> vdW: van der Waals

**A**

| TCR alpha V domain | CDR1                                                                                                                            | CDR2 | CDR3 |
|--------------------|---------------------------------------------------------------------------------------------------------------------------------|------|------|
| MEL5 TRAV12-2      | KEVEQNSGPL SVPEGAIASLNCTYS <b>DRGSQS</b> FFWYRQYSG KSPELIMSI <b>YSNGD</b> KEDGRFTAQLNKASQYVLLIRDSQPSPDSATYLC <b>AVNVAGKSTFG</b> |      |      |
| YF5048 TRAV12-2    | KEVEQNSGPLSVPEGAIASLNCTYS <b>DRGSQS</b> FFWYRQYSG KSPELIMSI <b>YSNGD</b> KEDGRFTAQLNKASQYVLLIRDSQPSPDSATYLC <b>AVNVAGKSTFG</b>  |      |      |

**B**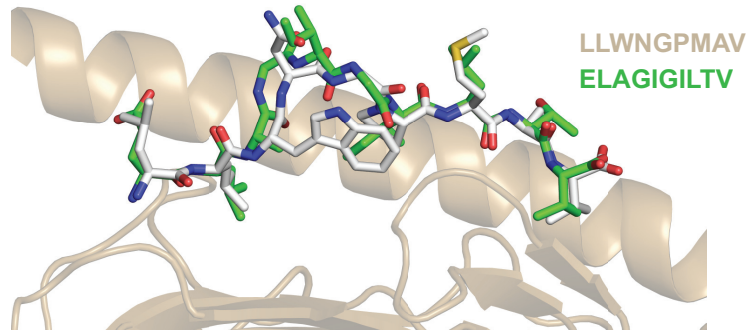

**Fig S1. High similarity between the YF5048 and MEL5 TCRs and their cognate pMHC complexes.**

(A) Alignment of the variable region of the TCR alpha chain of YF5048 and MEL5. (B) Superimposition of the peptides LLWNGPMAV in grey and ELAGIGILTV in green binding to the HLA-A2 molecule.

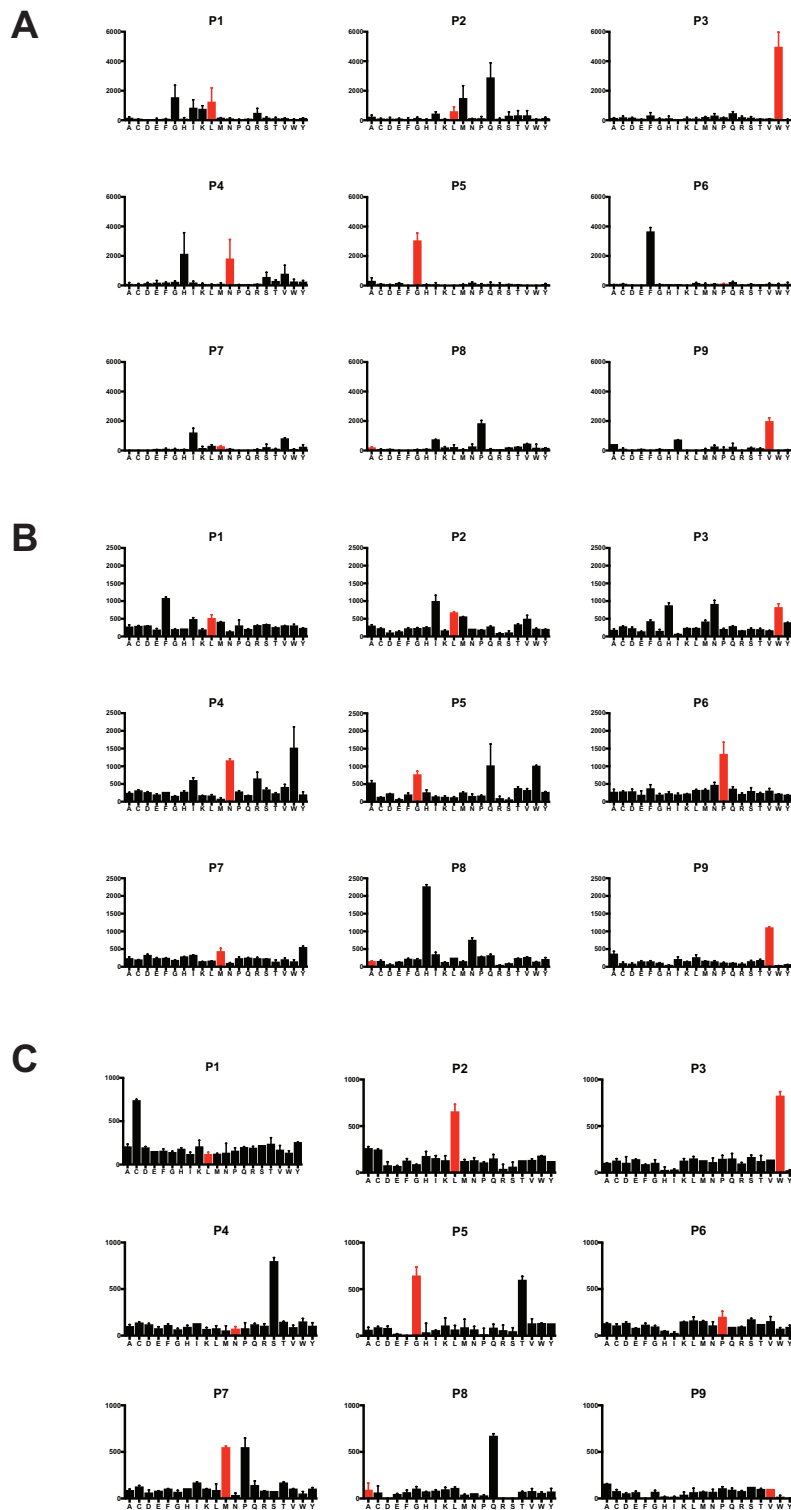

**Fig S2. Peptide recognition signature of individual TCRs derived from TRAV12-2 positive and negative clones specific for A2/LLW.**

Nonamer CPL scan for a TRAV12-2 positive A2/LLW-specific clone YF5031 (A), and for two TRAV12-2 negative A2/LLW-specific clones YF5001 (B) and YF5048NN1 (C) assayed by MIP-1 $\beta$  activation (mean and SD).

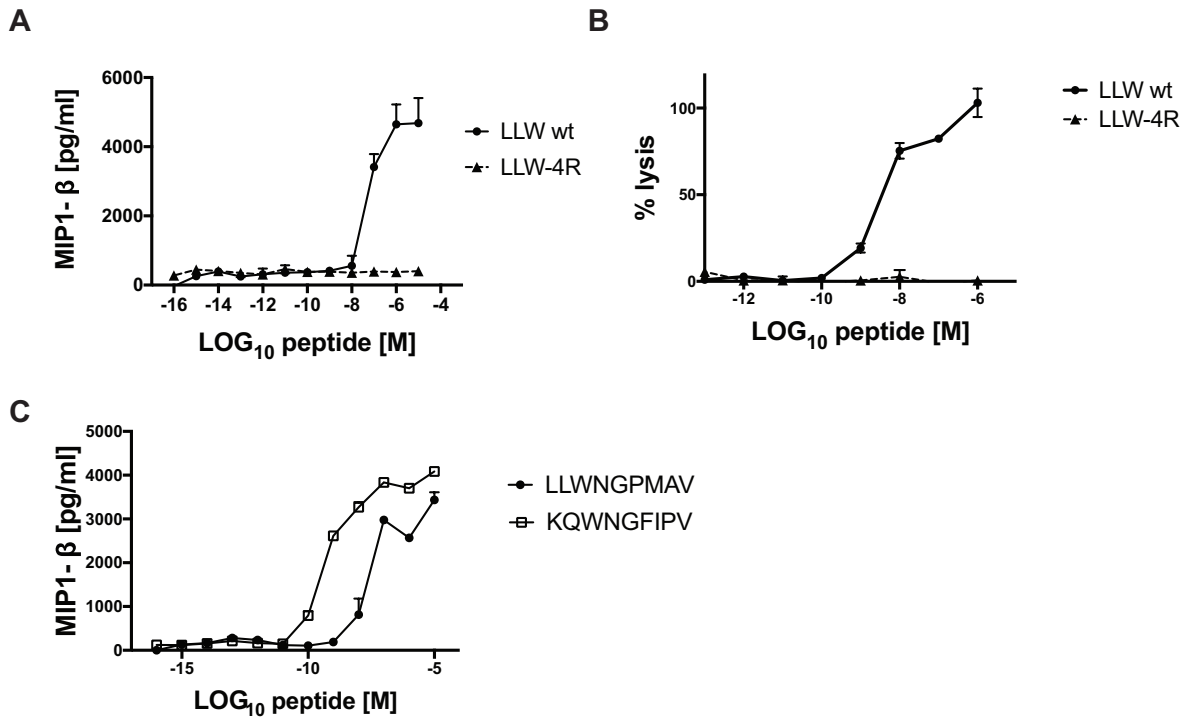

**Fig S3. Effect of the single substitution Asn4 -> Arg4 on clone YF5048.**

(A) Effect of the Asn4 -> Arg4 mutation on clone YF5048 assayed by MIP-1 $\beta$  activation with graded concentrations of the peptides LLWNGPMAV (LLW wt) or LLWRGPMVA (LLW-4R) (mean and SEM). (B) Killing capacity (51-chromium release assay) of clone YF5048 with titration of the LLW-wt or LLW-4R peptides (mean and SEM). (C) Effect of a strong agonist peptide on the TRAV12-2 positive clone YF5031 assayed by MIP-1 $\beta$  activation with graded concentrations of the peptides LLWNGPMAV or KQWNGFIPV (mean and SEM).
